# Supplementary material
Source: publisher figshare collection journal article supplement (https://osapublishing.figshare.com/ndownloader/files/13985801)
Supplement: Supplementary file 1 [file 13985801]

# tabulation of n and k
# Na.1WO3
Energy(eV), Wavelength(nm), n, k
0.6, 2066.4, 1.895896, 0.046825
0.605, 2049.33, 1.896202, 0.04808
0.61, 2032.53, 1.896538, 0.049358
0.615, 2016, 1.896889, 0.050659
0.62, 1999.74, 1.897246, 0.051983
0.625, 1983.75, 1.897605, 0.05333
0.63, 1968, 1.897963, 0.054701
0.635, 1952.51, 1.898317, 0.056089
0.64, 1937.25, 1.898662, 0.057501
0.645, 1922.24, 1.898998, 0.058934
0.65, 1907.45, 1.899325, 0.060384
0.655, 1892.89, 1.899638, 0.061856
0.66, 1878.55, 1.899938, 0.063347
0.665, 1864.42, 1.900223, 0.064855
0.67, 1850.51, 1.900491, 0.066383
0.675, 1836.8, 1.900746, 0.067926
0.68, 1823.3, 1.900981, 0.069485
0.685, 1809.99, 1.901197, 0.07106
0.69, 1796.87, 1.901394, 0.072655
0.695, 1783.95, 1.901572, 0.07426
0.7, 1771.2, 1.90173, 0.075881
0.705, 1758.64, 1.901867, 0.077518
0.71, 1746.26, 1.901983, 0.079167
0.715, 1734.04, 1.902076, 0.08083
0.72, 1722, 1.902148, 0.082504
0.725, 1710.13, 1.902196, 0.084189
0.73, 1698.41, 1.902222, 0.085889
0.735, 1686.86, 1.902223, 0.087598
0.74, 1675.46, 1.902201, 0.089317
0.745, 1664.22, 1.902154, 0.091047
0.75, 1653.12, 1.902083, 0.092785
0.755, 1642.17, 1.901987, 0.094532
0.76, 1631.37, 1.901865, 0.096287
0.765, 1620.71, 1.901719, 0.098051
0.77, 1610.18, 1.901545, 0.099821
0.775, 1599.8, 1.901345, 0.101599
0.78, 1589.54, 1.90112, 0.103384
0.785, 1579.42, 1.900869, 0.105173
0.79, 1569.42, 1.90059, 0.106969
0.795, 1559.55, 1.900284, 0.108768
0.8, 1549.8, 1.899952, 0.110574
0.805, 1540.18, 1.899589, 0.112379
0.81, 1530.67, 1.899202, 0.114192
0.815, 1521.28, 1.898786, 0.116006
0.82, 1512, 1.898342, 0.117821
0.825, 1502.84, 1.897871, 0.119639
0.83, 1493.79, 1.897372, 0.121457
0.835, 1484.84, 1.896844, 0.123278
0.84, 1476, 1.896286, 0.125097
0.845, 1467.27, 1.895703, 0.126918
0.85, 1458.64, 1.895087, 0.128735
0.855, 1450.11, 1.894446, 0.130553
0.86, 1441.68, 1.893774, 0.132368
0.865, 1433.34, 1.893073, 0.134181
0.87, 1425.11, 1.892344, 0.135992
0.875, 1416.96, 1.891584, 0.1378
0.88, 1408.91, 1.890796, 0.139602
0.885, 1400.95, 1.88998, 0.141401
0.89, 1393.08, 1.889131, 0.143195
0.895, 1385.3, 1.888256, 0.144983
0.9, 1377.6, 1.88735, 0.146764
0.905, 1369.99, 1.886416, 0.148541
0.91, 1362.46, 1.88545, 0.150309
0.915, 1355.02, 1.884456, 0.15207
0.92, 1347.65, 1.883431, 0.153823
0.925, 1340.37, 1.882379, 0.155566
0.93, 1333.16, 1.881296, 0.157301
0.935, 1326.03, 1.880183, 0.159027
0.94, 1318.98, 1.879039, 0.160742
0.945, 1312, 1.877868, 0.162445
0.95, 1305.1, 1.876665, 0.164139
0.955, 1298.26, 1.875435, 0.16582
0.96, 1291.5, 1.874172, 0.167487
0.965, 1284.81, 1.872883, 0.169143
0.97, 1278.19, 1.871563, 0.170785
0.975, 1271.63, 1.870213, 0.172413
0.98, 1265.14, 1.868832, 0.174026
0.985, 1258.72, 1.867424, 0.175624
0.99, 1252.37, 1.865986, 0.177206
0.995, 1246.07, 1.864519, 0.178772
1, 1239.84, 1.863021, 0.18032
1.005, 1233.67, 1.861494, 0.181851
1.01, 1227.57, 1.859939, 0.183363
1.015, 1221.52, 1.858355, 0.184857
1.02, 1215.53, 1.856742, 0.186331
1.025, 1209.6, 1.8551, 0.187788
1.03, 1203.73, 1.853428, 0.189222
1.035, 1197.91, 1.851727, 0.190635
1.04, 1192.16, 1.849998, 0.192024
1.045, 1186.45, 1.848243, 0.193394
1.05, 1180.8, 1.846457, 0.19474
1.055, 1175.21, 1.844644, 0.196062
1.06, 1169.66, 1.842803, 0.197359
1.065, 1164.17, 1.840933, 0.19863
1.07, 1158.73, 1.839036, 0.199879
1.075, 1153.34, 1.837109, 0.201098
1.08, 1148, 1.835157, 0.202293
1.085, 1142.71, 1.833176, 0.203458
1.09, 1137.47, 1.831169, 0.204596
1.095, 1132.28, 1.829135, 0.205704
1.1, 1127.13, 1.827074, 0.206784
1.105, 1122.03, 1.824986, 0.207832
1.11, 1116.97, 1.822871, 0.208849
1.115, 1111.97, 1.820728, 0.209836
1.12, 1107, 1.81856, 0.210787
1.125, 1102.08, 1.816367, 0.211708
1.13, 1097.21, 1.814146, 0.212596
1.135, 1092.37, 1.8119, 0.213447
1.14, 1087.58, 1.809627, 0.214262
1.145, 1082.83, 1.807328, 0.215041
1.15, 1078.12, 1.805002, 0.215786
1.155, 1073.46, 1.802651, 0.216492
1.16, 1068.83, 1.800272, 0.217159
1.165, 1064.24, 1.797868, 0.217786
1.17, 1059.69, 1.795435, 0.218376
1.175, 1055.18, 1.792975, 0.218924
1.18, 1050.71, 1.790486, 0.219432
1.185, 1046.28, 1.787964, 0.219898
1.19, 1041.88, 1.785411, 0.220322
1.195, 1037.52, 1.782815, 0.220701
1.2, 1033.2, 1.780171, 0.221043
1.205, 1028.91, 1.77745, 0.221311
1.21, 1024.66, 1.774684, 0.221479
1.215, 1020.45, 1.771889, 0.221543
1.22, 1016.26, 1.769077, 0.221505
1.225, 1012.12, 1.766262, 0.221366
1.23, 1008, 1.763448, 0.221129
1.235, 1003.92, 1.760645, 0.220797
1.24, 999.87, 1.757854, 0.220368
1.245, 995.86, 1.755082, 0.21985
1.25, 991.87, 1.752335, 0.219242
1.255, 987.92, 1.749618, 0.218545
1.26, 984, 1.746932, 0.217765
1.265, 980.11, 1.744284, 0.2169
1.27, 976.25, 1.741676, 0.215956
1.275, 972.43, 1.739111, 0.214934
1.28, 968.63, 1.736594, 0.213841
1.285, 964.86, 1.734125, 0.212672
1.29, 961.12, 1.731712, 0.211435
1.295, 957.41, 1.729351, 0.210134
1.3, 953.72, 1.727048, 0.208769
1.305, 950.07, 1.724805, 0.207342
1.31, 946.44, 1.722625, 0.205857
1.315, 942.85, 1.720511, 0.20432
1.32, 939.27, 1.718462, 0.202731
1.325, 935.73, 1.716479, 0.201095
1.33, 932.21, 1.714566, 0.199412
1.335, 928.72, 1.712726, 0.197688
1.34, 925.26, 1.710955, 0.195928
1.345, 921.82, 1.709262, 0.19413
1.35, 918.4, 1.707642, 0.192303
1.355, 915.01, 1.706095, 0.190446
1.36, 911.65, 1.704625, 0.188566
1.365, 908.31, 1.703233, 0.186666
1.37, 904.99, 1.70192, 0.184744
1.375, 901.7, 1.700682, 0.182812
1.38, 898.44, 1.699524, 0.180868
1.385, 895.19, 1.698441, 0.17892
1.39, 891.97, 1.697438, 0.176967
1.395, 888.78, 1.696514, 0.175012
1.4, 885.6, 1.695663, 0.173065
1.405, 882.45, 1.694891, 0.171126
1.41, 879.32, 1.694193, 0.169199
1.415, 876.21, 1.693572, 0.167285
1.42, 873.13, 1.69302, 0.165394
1.425, 870.06, 1.692542, 0.163523
1.43, 867.02, 1.692132, 0.161684
1.435, 864, 1.691792, 0.159872
1.44, 861, 1.691519, 0.158098
1.445, 858.02, 1.691307, 0.156358
1.45, 855.06, 1.691157, 0.154666
1.455, 852.12, 1.691063, 0.153019
1.46, 849.21, 1.691023, 0.15142
1.465, 846.31, 1.691033, 0.149878
1.47, 843.43, 1.691089, 0.148395
1.475, 840.57, 1.691183, 0.146974
1.48, 837.73, 1.691311, 0.145618
1.485, 834.91, 1.691467, 0.144333
1.49, 832.11, 1.691639, 0.143121
1.495, 829.33, 1.691816, 0.141992
1.5, 826.56, 1.691974, 0.140947
1.505, 823.82, 1.692075, 0.139955
1.51, 821.09, 1.692139, 0.138978
1.515, 818.38, 1.692187, 0.138013
1.52, 815.69, 1.692222, 0.137062
1.525, 813.01, 1.692247, 0.136123
1.53, 810.35, 1.692267, 0.135197
1.535, 807.71, 1.69228, 0.134283
1.54, 805.09, 1.692291, 0.133378
1.545, 802.49, 1.692304, 0.132485
1.55, 799.9, 1.692312, 0.131604
1.555, 797.33, 1.692321, 0.130731
1.56, 794.77, 1.692332, 0.129871
1.565, 792.23, 1.69234, 0.129019
1.57, 789.71, 1.692353, 0.128179
1.575, 787.2, 1.692364, 0.127346
1.58, 784.71, 1.692379, 0.126523
1.585, 782.23, 1.692396, 0.125712
1.59, 779.77, 1.692413, 0.124907
1.595, 777.33, 1.692431, 0.124111
1.6, 774.9, 1.692454, 0.123324
1.605, 772.49, 1.692477, 0.122545
1.61, 770.09, 1.692504, 0.121775
1.615, 767.7, 1.692529, 0.121014
1.62, 765.33, 1.692561, 0.120261
1.625, 762.98, 1.692591, 0.119515
1.63, 760.64, 1.692625, 0.118777
1.635, 758.31, 1.692659, 0.118045
1.64, 756, 1.692697, 0.117321
1.645, 753.7, 1.692736, 0.116604
1.65, 751.42, 1.692776, 0.115892
1.655, 749.15, 1.69282, 0.115189
1.66, 746.89, 1.692861, 0.114492
1.665, 744.65, 1.692909, 0.113801
1.67, 742.42, 1.692955, 0.113116
1.675, 740.2, 1.693004, 0.112436
1.68, 738, 1.693054, 0.111762
1.685, 735.81, 1.693104, 0.111095
1.69, 733.63, 1.693158, 0.110433
1.695, 731.47, 1.69321, 0.109776
1.7, 729.32, 1.693266, 0.109123
1.705, 727.18, 1.693324, 0.108476
1.71, 725.05, 1.693381, 0.107834
1.715, 722.94, 1.693438, 0.107196
1.72, 720.84, 1.693498, 0.10656
1.725, 718.75, 1.693559, 0.105931
1.73, 716.67, 1.69362, 0.105304
1.735, 714.61, 1.693682, 0.104683
1.74, 712.55, 1.693747, 0.104062
1.745, 710.51, 1.69381, 0.103447
1.75, 708.48, 1.693876, 0.102835
1.755, 706.46, 1.693939, 0.102226
1.76, 704.46, 1.694006, 0.10162
1.765, 702.46, 1.694073, 0.101014
1.77, 700.48, 1.694141, 0.100414
1.775, 698.5, 1.694209, 0.099813
1.78, 696.54, 1.694277, 0.099216
1.785, 694.59, 1.694348, 0.098619
1.79, 692.65, 1.694417, 0.098025
1.795, 690.72, 1.694486, 0.097434
1.8, 688.8, 1.694556, 0.096842
1.805, 686.89, 1.694622, 0.096251
1.81, 685, 1.694689, 0.095658
1.815, 683.11, 1.694756, 0.095061
1.82, 681.23, 1.694826, 0.094464
1.825, 679.37, 1.694898, 0.093864
1.83, 677.51, 1.694974, 0.093261
1.835, 675.66, 1.695053, 0.092658
1.84, 673.83, 1.695135, 0.092052
1.845, 672, 1.69522, 0.091442
1.85, 670.18, 1.695309, 0.090836
1.855, 668.38, 1.695403, 0.090223
1.86, 666.58, 1.6955, 0.089611
1.865, 664.79, 1.695603, 0.088998
1.87, 663.02, 1.69571, 0.088385
1.875, 661.25, 1.695822, 0.087768
1.88, 659.49, 1.695941, 0.087149
1.885, 657.74, 1.696065, 0.086532
1.89, 656, 1.696193, 0.085913
1.895, 654.27, 1.696327, 0.085293
1.9, 652.55, 1.696467, 0.084673
1.905, 650.84, 1.696613, 0.084052
1.91, 649.13, 1.696765, 0.083432
1.915, 647.44, 1.69692, 0.082809
1.92, 645.75, 1.697084, 0.082188
1.925, 644.07, 1.697255, 0.081567
1.93, 642.41, 1.697431, 0.080943
1.935, 640.75, 1.697613, 0.080321
1.94, 639.09, 1.697802, 0.0797
1.945, 637.45, 1.697997, 0.079079
1.95, 635.82, 1.698198, 0.078457
1.955, 634.19, 1.698405, 0.077838
1.96, 632.57, 1.698621, 0.077216
1.965, 630.96, 1.698843, 0.076596
1.97, 629.36, 1.699071, 0.075976
1.975, 627.77, 1.699305, 0.07536
1.98, 626.18, 1.699549, 0.074743
1.985, 624.61, 1.699795, 0.074126
1.99, 623.04, 1.700051, 0.073512
1.995, 621.47, 1.700316, 0.072898
2, 619.92, 1.700584, 0.072287
2.005, 618.37, 1.700861, 0.071675
2.01, 616.84, 1.701144, 0.071067
2.015, 615.31, 1.701433, 0.070461
2.02, 613.78, 1.701731, 0.069855
2.025, 612.27, 1.702036, 0.069252
2.03, 610.76, 1.702349, 0.068649
2.035, 609.26, 1.702666, 0.068052
2.04, 607.77, 1.702991, 0.067455
2.045, 606.28, 1.703326, 0.06686
2.05, 604.8, 1.703664, 0.066266
2.055, 603.33, 1.704011, 0.065677
2.06, 601.87, 1.704364, 0.065092
2.065, 600.41, 1.704726, 0.064506
2.07, 598.96, 1.705094, 0.063926
2.075, 597.51, 1.705468, 0.063346
2.08, 596.08, 1.705849, 0.062772
2.085, 594.65, 1.706238, 0.062201
2.09, 593.23, 1.706634, 0.061633
2.095, 591.81, 1.707038, 0.061068
2.1, 590.4, 1.707446, 0.060506
2.105, 589, 1.707862, 0.059946
2.11, 587.6, 1.708285, 0.059393
2.115, 586.21, 1.708717, 0.058842
2.12, 584.83, 1.709151, 0.058295
2.125, 583.46, 1.709595, 0.057753
2.13, 582.09, 1.710045, 0.057215
2.135, 580.72, 1.710504, 0.056679
2.14, 579.37, 1.710965, 0.056149
2.145, 578.01, 1.711436, 0.055623
2.15, 576.67, 1.71191, 0.055102
2.155, 575.33, 1.712393, 0.054587
2.16, 574, 1.712882, 0.054075
2.165, 572.68, 1.71338, 0.053569
2.17, 571.36, 1.71388, 0.053066
2.175, 570.04, 1.714387, 0.052569
2.18, 568.73, 1.7149, 0.052079
2.185, 567.43, 1.715422, 0.051594
2.19, 566.14, 1.715947, 0.051112
2.195, 564.85, 1.716477, 0.050635
2.2, 563.56, 1.717017, 0.050168
2.205, 562.29, 1.717559, 0.049704
2.21, 561.01, 1.718108, 0.049243
2.215, 559.75, 1.718663, 0.04879
2.22, 558.49, 1.719223, 0.048344
2.225, 557.23, 1.719786, 0.047904
2.23, 555.98, 1.720358, 0.04747
2.235, 554.74, 1.720934, 0.047041
2.24, 553.5, 1.721515, 0.046622
2.245, 552.27, 1.722099, 0.046205
2.25, 551.04, 1.722689, 0.045797
2.255, 549.82, 1.723285, 0.045396
2.26, 548.6, 1.723884, 0.045
2.265, 547.39, 1.724488, 0.04461
2.27, 546.19, 1.725099, 0.044229
2.275, 544.99, 1.72571, 0.043854
2.28, 543.79, 1.726326, 0.043488
2.285, 542.6, 1.726948, 0.043128
2.29, 541.42, 1.727571, 0.042777
2.295, 540.24, 1.728199, 0.042431
2.3, 539.06, 1.72883, 0.042092
2.305, 537.89, 1.729463, 0.041762
2.31, 536.73, 1.7301, 0.04144
2.315, 535.57, 1.73074, 0.041127
2.32, 534.41, 1.731383, 0.04082
2.325, 533.27, 1.732028, 0.040519
2.33, 532.12, 1.732674, 0.04023
2.335, 530.98, 1.733325, 0.039946
2.34, 529.85, 1.733974, 0.039674
2.345, 528.72, 1.734625, 0.039409
2.35, 527.59, 1.735279, 0.039152
2.355, 526.47, 1.73593, 0.038901
2.36, 525.36, 1.736584, 0.038662
2.365, 524.25, 1.737235, 0.038432
2.37, 523.14, 1.73789, 0.03821
2.375, 522.04, 1.738538, 0.037994
2.38, 520.94, 1.739189, 0.03779
2.385, 519.85, 1.739834, 0.037595
2.39, 518.76, 1.740477, 0.037412
2.395, 517.68, 1.741114, 0.037235
2.4, 516.6, 1.741742, 0.037069
2.405, 515.53, 1.742358, 0.036907
2.41, 514.46, 1.742963, 0.036742
2.415, 513.39, 1.743565, 0.036577
2.42, 512.33, 1.744163, 0.036413
2.425, 511.28, 1.744756, 0.036245
2.43, 510.22, 1.745349, 0.036079
2.435, 509.18, 1.745938, 0.035909
2.44, 508.13, 1.746524, 0.035739
2.445, 507.09, 1.747111, 0.03557
2.45, 506.06, 1.747697, 0.035398
2.455, 505.03, 1.748282, 0.035229
2.46, 504, 1.748868, 0.035054
2.465, 502.98, 1.74945, 0.034882
2.47, 501.96, 1.750036, 0.034711
2.475, 500.95, 1.750623, 0.034536
2.48, 499.94, 1.751208, 0.034362
2.485, 498.93, 1.751799, 0.034188
2.49, 497.93, 1.752386, 0.034011
2.495, 496.93, 1.752976, 0.033836
2.5, 495.94, 1.753569, 0.033663
2.505, 494.95, 1.754161, 0.033486
2.51, 493.96, 1.754756, 0.033309
2.515, 492.98, 1.755354, 0.033135
2.52, 492, 1.755952, 0.032959
2.525, 491.03, 1.756552, 0.032783
2.53, 490.06, 1.757155, 0.03261
2.535, 489.09, 1.757761, 0.032433
2.54, 488.13, 1.758369, 0.03226
2.545, 487.17, 1.75898, 0.032084
2.55, 486.21, 1.759593, 0.031911
2.555, 485.26, 1.760209, 0.031738
2.56, 484.31, 1.760826, 0.031564
2.565, 483.37, 1.761447, 0.031392
2.57, 482.43, 1.762071, 0.031222
2.575, 481.49, 1.762698, 0.031049
2.58, 480.56, 1.763327, 0.030879
2.585, 479.63, 1.763962, 0.030709
2.59, 478.7, 1.764597, 0.030542
2.595, 477.78, 1.765237, 0.030375
2.6, 476.86, 1.76588, 0.030209
2.605, 475.95, 1.766526, 0.030042
2.61, 475.04, 1.767174, 0.029878
2.615, 474.13, 1.767827, 0.029714
2.62, 473.22, 1.768483, 0.029554
2.625, 472.32, 1.769142, 0.029392
2.63, 471.42, 1.769806, 0.029232
2.635, 470.53, 1.770473, 0.029074
2.64, 469.64, 1.771143, 0.028919
2.645, 468.75, 1.771818, 0.028764
2.65, 467.86, 1.772495, 0.028612
2.655, 466.98, 1.773175, 0.02846
2.66, 466.11, 1.773861, 0.028308
2.665, 465.23, 1.774549, 0.028162
2.67, 464.36, 1.775242, 0.028016
2.675, 463.49, 1.775938, 0.02787
2.68, 462.63, 1.776637, 0.027726
2.685, 461.77, 1.777341, 0.027586
2.69, 460.91, 1.778048, 0.027449
2.695, 460.05, 1.77876, 0.027314
2.7, 459.2, 1.779474, 0.027179
2.705, 458.35, 1.780194, 0.027048
2.71, 457.51, 1.780917, 0.026916
2.715, 456.66, 1.781645, 0.02679
2.72, 455.82, 1.782375, 0.026664
2.725, 454.99, 1.783111, 0.026543
2.73, 454.15, 1.783849, 0.026423
2.735, 453.32, 1.78459, 0.026306
2.74, 452.5, 1.785336, 0.026191
2.745, 451.67, 1.786088, 0.026079
2.75, 450.85, 1.786842, 0.02597
2.755, 450.03, 1.787601, 0.025864
2.76, 449.22, 1.788363, 0.025758
2.765, 448.41, 1.789131, 0.025658
2.77, 447.6, 1.7899, 0.02556
2.775, 446.79, 1.790675, 0.025465
2.78, 445.99, 1.791453, 0.025376
2.785, 445.19, 1.792233, 0.025287
2.79, 444.39, 1.793021, 0.0252
2.795, 443.59, 1.793809, 0.025119
2.8, 442.8, 1.794605, 0.025042
2.805, 442.01, 1.795401, 0.024967
2.81, 441.22, 1.796204, 0.024894
2.815, 440.44, 1.797008, 0.024824
2.82, 439.66, 1.797816, 0.024761
2.825, 438.88, 1.79863, 0.024699
2.83, 438.11, 1.799446, 0.024641
2.835, 437.33, 1.800268, 0.024588
2.84, 436.56, 1.801092, 0.024538
2.845, 435.8, 1.801921, 0.02449
2.85, 435.03, 1.802753, 0.024448
2.855, 434.27, 1.803587, 0.024409
2.86, 433.51, 1.804426, 0.024376
2.865, 432.75, 1.805268, 0.024345
2.87, 432, 1.806115, 0.024317
2.875, 431.25, 1.806964, 0.024295
2.88, 430.5, 1.807819, 0.024278
2.885, 429.75, 1.808676, 0.024264
2.89, 429.01, 1.809535, 0.024255
2.895, 428.27, 1.810397, 0.024249
2.9, 427.53, 1.811264, 0.024248
2.905, 426.8, 1.812136, 0.02425
2.91, 426.06, 1.813008, 0.024261
2.915, 425.33, 1.813885, 0.024271
2.92, 424.6, 1.814764, 0.024289
2.925, 423.88, 1.815646, 0.024311
2.93, 423.15, 1.816533, 0.024337
2.935, 422.43, 1.817422, 0.02437
2.94, 421.71, 1.818314, 0.024404
2.945, 421, 1.819208, 0.024447
2.95, 420.29, 1.820104, 0.024493
2.955, 419.57, 1.821003, 0.024544
2.96, 418.87, 1.821904, 0.0246
2.965, 418.16, 1.822808, 0.02466
2.97, 417.46, 1.823716, 0.024727
2.975, 416.75, 1.824622, 0.024799
2.98, 416.05, 1.825532, 0.024875
2.985, 415.36, 1.826445, 0.024955
2.99, 414.66, 1.827358, 0.025044
2.995, 413.97, 1.82827, 0.025135
3, 413.28, 1.829185, 0.025235
3.005, 412.59, 1.830096, 0.025337
3.01, 411.91, 1.83101, 0.025442
3.015, 411.22, 1.831923, 0.02555
3.02, 410.54, 1.832836, 0.025659
3.025, 409.87, 1.833751, 0.025772
3.03, 409.19, 1.834666, 0.025888
3.035, 408.51, 1.835586, 0.026005
3.04, 407.84, 1.836506, 0.026125
3.045, 407.17, 1.837427, 0.026249
3.05, 406.51, 1.838351, 0.026374
3.055, 405.84, 1.839275, 0.026502
3.06, 405.18, 1.840204, 0.026633
3.065, 404.52, 1.841132, 0.026766
3.07, 403.86, 1.842065, 0.026902
3.075, 403.2, 1.842998, 0.02704
3.08, 402.55, 1.843936, 0.027181
3.085, 401.89, 1.844876, 0.027327
3.09, 401.24, 1.845816, 0.027473
3.095, 400.6, 1.84676, 0.027621
3.1, 399.95, 1.847707, 0.027775
3.105, 399.3, 1.848656, 0.027928
3.11, 398.66, 1.849608, 0.028087
3.115, 398.02, 1.850561, 0.028248
3.12, 397.39, 1.851518, 0.028412
3.125, 396.75, 1.852479, 0.028578
3.13, 396.12, 1.853442, 0.028747
3.135, 395.48, 1.854407, 0.028918
3.14, 394.85, 1.855375, 0.029094
3.145, 394.23, 1.856345, 0.02927
3.15, 393.6, 1.85732, 0.029451
3.155, 392.98, 1.858297, 0.029635
3.16, 392.36, 1.859279, 0.029818
3.165, 391.74, 1.860261, 0.030009
3.17, 391.12, 1.861247, 0.0302
3.175, 390.5, 1.862239, 0.030393
3.18, 389.89, 1.863233, 0.030592
3.185, 389.28, 1.864229, 0.030793
3.19, 388.67, 1.865227, 0.030993
3.195, 388.06, 1.86623, 0.031202
3.2, 387.45, 1.867238, 0.03141
3.205, 386.85, 1.868245, 0.031623
3.21, 386.24, 1.86926, 0.031836
3.215, 385.64, 1.870277, 0.032054
3.22, 385.04, 1.871297, 0.032274
3.225, 384.45, 1.872321, 0.032499
3.23, 383.85, 1.873348, 0.032727
3.235, 383.26, 1.874379, 0.032955
3.24, 382.67, 1.875415, 0.03319
3.245, 382.08, 1.876453, 0.033425
3.25, 381.49, 1.877497, 0.033664
3.255, 380.9, 1.878542, 0.033907
3.26, 380.32, 1.879592, 0.034151
3.265, 379.74, 1.880647, 0.034398
3.27, 379.16, 1.881707, 0.034649
3.275, 378.58, 1.882769, 0.034903
3.28, 378, 1.883836, 0.03516
3.285, 377.43, 1.884907, 0.035421
3.29, 376.85, 1.885981, 0.035684
3.295, 376.28, 1.887062, 0.03595
3.3, 375.71, 1.888145, 0.036218
3.305, 375.14, 1.889233, 0.036491
3.31, 374.57, 1.890326, 0.036766
3.315, 374.01, 1.891423, 0.037046
3.32, 373.45, 1.892526, 0.037328
3.325, 372.88, 1.893633, 0.037613
3.33, 372.32, 1.894744, 0.037902
3.335, 371.77, 1.895861, 0.038193
3.34, 371.21, 1.896985, 0.038487
3.345, 370.66, 1.898111, 0.038783
3.35, 370.1, 1.899244, 0.039084
3.355, 369.55, 1.900379, 0.039389
3.36, 369, 1.901522, 0.039697
3.365, 368.45, 1.902672, 0.040007
3.37, 367.91, 1.903824, 0.040319
3.375, 367.36, 1.904983, 0.040635
3.38, 366.82, 1.90615, 0.040957
3.385, 366.28, 1.907321, 0.04128
3.39, 365.74, 1.908497, 0.041606
3.395, 365.2, 1.90968, 0.041934
3.4, 364.66, 1.910871, 0.042266
3.405, 364.12, 1.912066, 0.042603
3.41, 363.59, 1.913268, 0.042942
3.415, 363.06, 1.914477, 0.043283
3.42, 362.53, 1.915691, 0.043629
3.425, 362, 1.916915, 0.043979
3.43, 361.47, 1.918144, 0.044329
3.435, 360.94, 1.919382, 0.044686
3.44, 360.42, 1.920627, 0.045042
3.445, 359.9, 1.92188, 0.045406
3.45, 359.37, 1.923139, 0.045769
3.455, 358.85, 1.924409, 0.046139
3.46, 358.34, 1.925685, 0.046508
3.465, 357.82, 1.926971, 0.046884
3.47, 357.3, 1.928267, 0.04726
3.475, 356.79, 1.92957, 0.047643
3.48, 356.28, 1.930882, 0.048027
3.485, 355.77, 1.932204, 0.048413
3.49, 355.26, 1.933539, 0.048804
3.495, 354.75, 1.934883, 0.049196
3.5, 354.24, 1.936236, 0.049593
3.505, 353.74, 1.937601, 0.049995
3.51, 353.23, 1.938979, 0.050397
3.515, 352.73, 1.940369, 0.050805
3.52, 352.23, 1.941771, 0.051214
3.525, 351.73, 1.943187, 0.051626
3.53, 351.23, 1.944615, 0.052041
3.535, 350.73, 1.946058, 0.052459
3.54, 350.24, 1.947518, 0.052883
3.545, 349.74, 1.948992, 0.053307
3.55, 349.25, 1.950487, 0.053735
3.555, 348.76, 1.951997, 0.054165
3.56, 348.27, 1.953525, 0.054598
3.565, 347.78, 1.955075, 0.055036
3.57, 347.29, 1.95665, 0.055475
3.575, 346.81, 1.958246, 0.055917
3.58, 346.32, 1.959869, 0.056363
3.585, 345.84, 1.961522, 0.05681
3.59, 345.36, 1.963209, 0.05726
3.595, 344.88, 1.964938, 0.057714
3.6, 344.4, 1.966716, 0.058168
3.605, 343.92, 1.968571, 0.058651
3.61, 343.45, 1.970478, 0.059189
3.615, 342.97, 1.972421, 0.059782
3.62, 342.5, 1.974391, 0.060426
3.625, 342.03, 1.976385, 0.061127
3.63, 341.55, 1.978396, 0.061878
3.635, 341.08, 1.980419, 0.062681
3.64, 340.62, 1.982452, 0.063535
3.645, 340.15, 1.984496, 0.06444
3.65, 339.68, 1.986541, 0.06539
3.655, 339.22, 1.988592, 0.066391
3.66, 338.75, 1.990643, 0.067438
3.665, 338.29, 1.992691, 0.068533
3.67, 337.83, 1.994737, 0.06967
3.675, 337.37, 1.996778, 0.070854
3.68, 336.91, 1.998814, 0.072083
3.685, 336.46, 2.00084, 0.073351
3.69, 336, 2.002859, 0.074663
3.695, 335.55, 2.004866, 0.076017
3.7, 335.09, 2.006861, 0.077409
3.705, 334.64, 2.008847, 0.078844
3.71, 334.19, 2.010816, 0.080315
3.715, 333.74, 2.012773, 0.081825
3.72, 333.29, 2.014714, 0.083371
3.725, 332.84, 2.016638, 0.084953
3.73, 332.4, 2.018543, 0.086572
3.735, 331.95, 2.020434, 0.088224
3.74, 331.51, 2.022304, 0.08991
3.745, 331.07, 2.024153, 0.091631
3.75, 330.62, 2.025986, 0.093382
3.755, 330.18, 2.027796, 0.095165
3.76, 329.75, 2.029585, 0.096978
3.765, 329.31, 2.031353, 0.098823
3.77, 328.87, 2.033096, 0.100696
3.775, 328.43, 2.034818, 0.102596
3.78, 328, 2.036518, 0.104526
3.785, 327.57, 2.038193, 0.106482
3.79, 327.14, 2.039842, 0.108464
3.795, 326.7, 2.041469, 0.110472
3.8, 326.27, 2.043068, 0.112505
3.805, 325.85, 2.044643, 0.11456
3.81, 325.42, 2.046193, 0.116638
3.815, 324.99, 2.047716, 0.118742
3.82, 324.57, 2.049212, 0.120866
3.825, 324.14, 2.050681, 0.12301
3.83, 323.72, 2.052123, 0.125175
3.835, 323.3, 2.053536, 0.127361
3.84, 322.88, 2.054925, 0.129567
3.845, 322.46, 2.056283, 0.131789
3.85, 322.04, 2.057614, 0.134029
3.855, 321.62, 2.058918, 0.136285
3.86, 321.2, 2.060192, 0.13856
3.865, 320.79, 2.061436, 0.140848
3.87, 320.37, 2.062652, 0.143153
3.875, 319.96, 2.063839, 0.145469
3.88, 319.55, 2.064998, 0.147801
3.885, 319.14, 2.066125, 0.150146
3.89, 318.73, 2.067225, 0.152504
3.895, 318.32, 2.068295, 0.154872
3.9, 317.91, 2.069333, 0.157251
3.905, 317.5, 2.070344, 0.15964
3.91, 317.1, 2.071322, 0.162039
3.915, 316.69, 2.072273, 0.164448
3.92, 316.29, 2.073194, 0.166863
3.925, 315.88, 2.074083, 0.169289
3.93, 315.48, 2.074943, 0.171718
3.935, 315.08, 2.075772, 0.174157
3.94, 314.68, 2.076573, 0.176598
3.945, 314.28, 2.077342, 0.179046
3.95, 313.88, 2.078081, 0.181499
3.955, 313.49, 2.07879, 0.183955
3.96, 313.09, 2.079471, 0.186412
3.965, 312.7, 2.080119, 0.188873
3.97, 312.3, 2.080738, 0.191338
3.975, 311.91, 2.081329, 0.193801
3.98, 311.52, 2.081889, 0.196266
3.985, 311.13, 2.082418, 0.19873
3.99, 310.74, 2.082918, 0.201193
3.995, 310.35, 2.083388, 0.203656
4, 309.96, 2.083832, 0.206115
4.005, 309.57, 2.084244, 0.208572
4.01, 309.19, 2.084625, 0.211026
4.015, 308.8, 2.08498, 0.213474
4.02, 308.42, 2.085306, 0.215918
4.025, 308.04, 2.085603, 0.218356
4.03, 307.65, 2.085871, 0.22079
4.035, 307.27, 2.086112, 0.223217
4.04, 306.89, 2.086325, 0.225633
4.045, 306.51, 2.08651, 0.228043
4.05, 306.13, 2.086668, 0.230446
4.055, 305.76, 2.0868, 0.232837
4.06, 305.38, 2.086904, 0.235219
4.065, 305, 2.086981, 0.237589
4.07, 304.63, 2.087033, 0.239948
4.075, 304.26, 2.087059, 0.242293
4.08, 303.88, 2.087061, 0.244626
4.085, 303.51, 2.087034, 0.246946
4.09, 303.14, 2.086987, 0.249252
4.095, 302.77, 2.086915, 0.251541
4.1, 302.4, 2.086819, 0.253817
4.105, 302.03, 2.086699, 0.256074
4.11, 301.66, 2.086558, 0.258313
4.115, 301.3, 2.086396, 0.260535
4.12, 300.93, 2.08621, 0.262737
4.125, 300.57, 2.086006, 0.26492
4.13, 300.2, 2.085781, 0.267082
4.135, 299.84, 2.085539, 0.269225
4.14, 299.48, 2.085279, 0.271343
4.145, 299.12, 2.084999, 0.273439
4.15, 298.76, 2.084705, 0.275511
4.155, 298.4, 2.084397, 0.27756
4.16, 298.04, 2.084072, 0.279582
4.165, 297.68, 2.083739, 0.281578
4.17, 297.32, 2.083391, 0.283545
4.175, 296.97, 2.083037, 0.285487
4.18, 296.61, 2.082673, 0.287398
4.185, 296.26, 2.082307, 0.289278
4.19, 295.9, 2.081938, 0.291125
4.195, 295.55, 2.081573, 0.292942
4.2, 295.2, 2.081218, 0.294722
4.205, 294.85, 2.080887, 0.296479
4.21, 294.5, 2.080575, 0.298227
4.215, 294.15, 2.080272, 0.299968
4.22, 293.8, 2.079979, 0.3017
4.225, 293.45, 2.079691, 0.303425
4.23, 293.11, 2.079409, 0.305144
4.235, 292.76, 2.079132, 0.306854
4.24, 292.42, 2.078858, 0.308559
4.245, 292.07, 2.078586, 0.310259
4.25, 291.73, 2.078318, 0.311952
4.255, 291.38, 2.078052, 0.313638
4.26, 291.04, 2.077786, 0.315316
4.265, 290.7, 2.077523, 0.31699
4.27, 290.36, 2.077264, 0.318659
4.275, 290.02, 2.077002, 0.320322
4.28, 289.68, 2.076743, 0.32198
4.285, 289.34, 2.076487, 0.323631
4.29, 289.01, 2.076229, 0.32528
4.295, 288.67, 2.075974, 0.326919
4.3, 288.34, 2.075717, 0.328556
4.305, 288, 2.075462, 0.330186
4.31, 287.67, 2.075208, 0.331812
4.315, 287.33, 2.074955, 0.333434
4.32, 287, 2.074702, 0.33505
4.325, 286.67, 2.074447, 0.336663
4.33, 286.34, 2.074195, 0.338269
4.335, 286.01, 2.073944, 0.339871
4.34, 285.68, 2.073693, 0.34147
4.345, 285.35, 2.073442, 0.343065
4.35, 285.02, 2.07319, 0.344655
4.355, 284.69, 2.07294, 0.34624
4.36, 284.37, 2.072689, 0.347821
4.365, 284.04, 2.072441, 0.3494
4.37, 283.72, 2.072192, 0.350971
4.375, 283.39, 2.071943, 0.352543
4.38, 283.07, 2.071693, 0.354109
4.385, 282.75, 2.071447, 0.355672
4.39, 282.42, 2.071199, 0.35723
4.395, 282.1, 2.070953, 0.358784
4.4, 281.78, 2.070706, 0.360338
4.405, 281.46, 2.070459, 0.361886
4.41, 281.14, 2.070213, 0.363431
4.415, 280.82, 2.06997, 0.364973
4.42, 280.51, 2.069725, 0.366514
4.425, 280.19, 2.069481, 0.368051
4.43, 279.87, 2.069237, 0.369583
4.435, 279.56, 2.068994, 0.371115
4.44, 279.24, 2.068754, 0.372642
4.445, 278.93, 2.068512, 0.374167
4.45, 278.62, 2.068271, 0.37569
4.455, 278.3, 2.06803, 0.377211
4.46, 277.99, 2.067793, 0.37873
4.465, 277.68, 2.067554, 0.380247
4.47, 277.37, 2.067315, 0.381759
4.475, 277.06, 2.067079, 0.38327
4.48, 276.75, 2.066842, 0.38478
4.485, 276.44, 2.066608, 0.386287
4.49, 276.13, 2.066372, 0.387793
4.495, 275.83, 2.066139, 0.389296
4.5, 275.52, 2.065908, 0.390799
4.505, 275.21, 2.065674, 0.3923
4.51, 274.91, 2.065444, 0.393799
4.515, 274.61, 2.065214, 0.395295
4.52, 274.3, 2.064985, 0.396792
4.525, 274, 2.064757, 0.398286
4.53, 273.7, 2.06453, 0.399781
4.535, 273.39, 2.064306, 0.401273
4.54, 273.09, 2.06408, 0.402763
4.545, 272.79, 2.063856, 0.404255
4.55, 272.49, 2.063634, 0.405743
4.555, 272.19, 2.063412, 0.407233
4.56, 271.9, 2.063193, 0.408721
4.565, 271.6, 2.062974, 0.410208
4.57, 271.3, 2.062754, 0.411694
4.575, 271, 2.062537, 0.41318
4.58, 270.71, 2.062321, 0.414666
4.585, 270.41, 2.062106, 0.416152
4.59, 270.12, 2.061893, 0.417638
4.595, 269.82, 2.061683, 0.419123
4.6, 269.53, 2.061471, 0.42061
4.605, 269.24, 2.06126, 0.422096
4.61, 268.95, 2.061053, 0.42358
4.615, 268.65, 2.060845, 0.425066
4.62, 268.36, 2.06064, 0.426552
4.625, 268.07, 2.060436, 0.428038
4.63, 267.78, 2.060233, 0.429524
4.635, 267.5, 2.06003, 0.431013
4.64, 267.21, 2.05983, 0.432501
4.645, 266.92, 2.059631, 0.43399
4.65, 266.63, 2.059433, 0.435479
4.655, 266.35, 2.059236, 0.43697
4.66, 266.06, 2.059043, 0.438461
4.665, 265.78, 2.058849, 0.439955
4.67, 265.49, 2.058656, 0.441448
4.675, 265.21, 2.058468, 0.442943
4.68, 264.92, 2.058278, 0.444439
4.685, 264.64, 2.058089, 0.445938
4.69, 264.36, 2.057904, 0.447436
4.695, 264.08, 2.057718, 0.448936
4.7, 263.8, 2.057536, 0.450439
4.705, 263.52, 2.057356, 0.451941
4.71, 263.24, 2.057177, 0.453449
4.715, 262.96, 2.056997, 0.454957
4.72, 262.68, 2.056821, 0.456466
4.725, 262.4, 2.056646, 0.457976
4.73, 262.12, 2.056473, 0.45949
4.735, 261.85, 2.056302, 0.461007
4.74, 261.57, 2.056135, 0.462526
4.745, 261.29, 2.055966, 0.464044
4.75, 261.02, 2.055802, 0.465567
4.755, 260.74, 2.055638, 0.467093
4.76, 260.47, 2.055477, 0.468621
4.765, 260.2, 2.055321, 0.470153
4.77, 259.92, 2.055164, 0.471685
4.775, 259.65, 2.055011, 0.473221
4.78, 259.38, 2.054862, 0.474759
4.785, 259.11, 2.054714, 0.4763
4.79, 258.84, 2.054574, 0.477843
4.795, 258.57, 2.054435, 0.47939
